# Supplementary material for: Green Processes for Green Products: The Use of Supercritical CO2 as Green Solvent for Compatibilized Polymer Blends
Source: MDPI journal article supplement (doi:10.3390/polym10111285), 2018-11-19
Supplement: s1 [file s1]

## Supplementary information

Table S1 Overview of experiments in the melt

| Sample       | Intake (%-mol) |      |       | FD (%) |
|--------------|----------------|------|-------|--------|
|              | GMA            | BPO  | PCL   |        |
| PCL-g-GMA 1  | 12             | 0.60 | 87.40 | 5.89   |
| PCL-g-GMA 2  | 24             | 0.60 | 75.40 | 20.98  |
| PCL-g-GMA 3  | 36             | 0.60 | 63.40 | 45.62  |
| PCL-g-GMA 4  | 6              | 0.30 | 93.70 | 1.71   |
| PCL-g-GMA 5  | 24             | 1.10 | 74.90 | 20.45  |
| PCL-g-GMA 6  | 12             | 0.30 | 87.70 | 7.58   |
| PCL-g-GMA 7  | 10             | 0.30 | 89.70 | 5.16   |
| PCL-g-GMA 8  | 18             | 0.30 | 81.70 | 14.93  |
| PCL-g-GMA 9  | 24             | 0.30 | 75.70 | 19.58  |
| PCL-g-GMA 10 | 12             | 1.10 | 86.90 | 5.78   |
| PCL-g-GMA 11 | 36             | 1.10 | 62.90 | 36.21  |
| PCL-g-GMA 12 | 12             | 0.10 | 87.90 | 9.69   |
| PCL-g-GMA 13 | 24             | 0.10 | 75.90 | 18.86  |

### Morphology characterization

The morphology of the investigated blends was studied by SEM, for example as function of the compatibilizer (PCL-g-GMA) intake (Figure S1).

Figure S1. Blends morphology as function of the PCL-g-GMA intake.

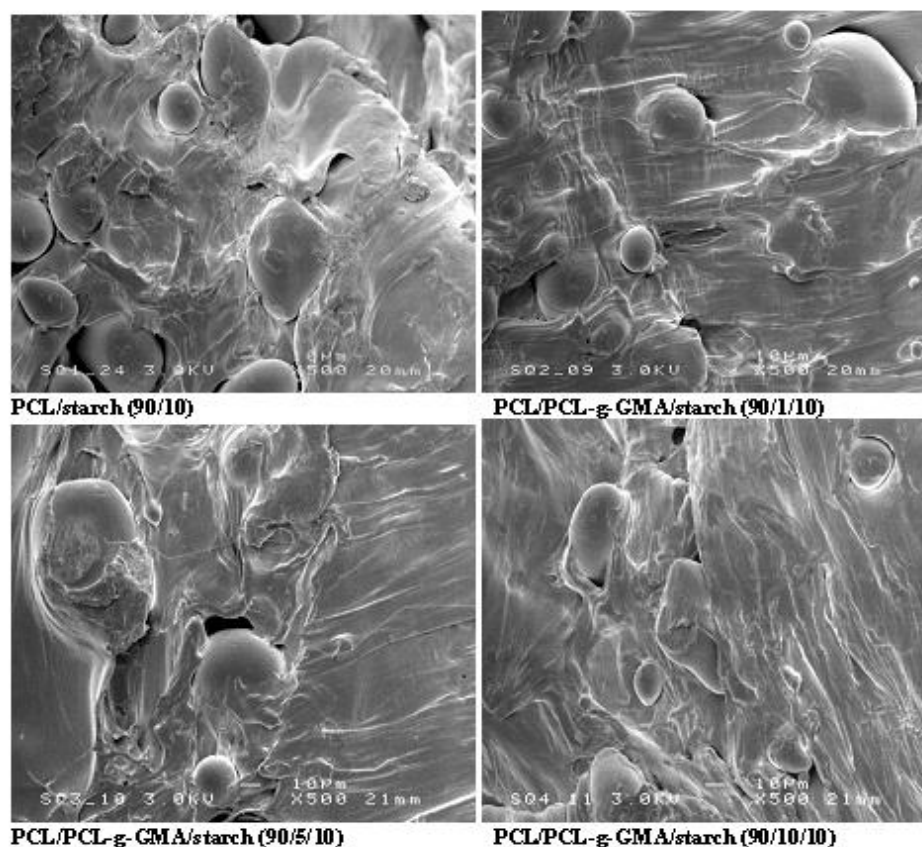

While a clear difference in the interfacial adhesion (lack of voids) can be seen between the blend without PCL-g-GMA and the rest (especially at 10 wt % intake), no clear trends can be detected.

#### *Selective solvent extraction*

Extraction with chloroform was used to characterize, albeit indirectly, the reaction at the interface between PCL-g-GMA and starch. To this end a blend PCL-g-GMA/S 70/30 was prepared according to the same procedure as for all the others and extracted together with the corresponding reference PCL/S (Table S??).

Table S2. Selective solvent extraction data

| Sample <sup>a</sup> | Insoluble fraction (wt %) |
|---------------------|---------------------------|
| PCL/S 70/30         | 29±2                      |
| PCL-g-GMA/S 70/30   | 32±2                      |

<sup>a</sup> Samples are denoted by their components followed by their weight fractions

Although the measured values are quite close to each other, their difference indicates that a part of PCL-g-GMA (contrary to PCL) is retained in the insoluble fraction.

#### *DSC characterization*

Blends were also characterized by DSC analysis (Table S3). The results show a substantial invariance of the thermal properties as function of the GMA intake (see data for PCL/S/PCL-g-GMA 80/20/5). It is worth noticing here that at FD=15 mol % an increase in the PCL melting and crystallization enthalpy is detected and probably due to a nucleation effect of the GMA groups.

Table S3. Thermal properties of the prepared blends.

| Sample                    | FD (mol %)<br>PCL-g-GMA | T <sub>c</sub><br>(°C) | ΔH <sub>c</sub><br>(J/g <sub>PCL</sub> ) | T <sub>m</sub><br>(°C) | ΔH <sub>m</sub><br>(J/g <sub>PCL</sub> ) |
|---------------------------|-------------------------|------------------------|------------------------------------------|------------------------|------------------------------------------|
| PCL/S 100/0               | n.a.                    | 33                     | 55                                       | 53                     | 68                                       |
| PCL/S 90/10               | n.a.                    | 34                     | 51                                       | 57                     | 69                                       |
| PCL/S 80/20               | n.a.                    | 32                     | 50                                       | 56                     | 75                                       |
| PCL/S 70/30               | n.a.                    | 32                     | 47                                       | 57                     | 66                                       |
| PCL/S/PCL-g-GMA 90/10/1   | 6                       | 33                     | 56                                       | 56                     | 75                                       |
| PCL/S/PCL-g-GMA 90/10/5   | 6                       | 35                     | 53                                       | 54                     | 74                                       |
| PCL/ S/PCL-g-GMA 90/10/10 | 6                       | 34                     | 57                                       | 57                     | 74                                       |
| PCL/ S/PCL-g-GMA 80/20/5  | 15                      | 33                     | 63                                       | 56                     | 87                                       |
| PCL/ S/PCL-g-GMA 80/20/5  | 6                       | 33                     | 56                                       | 56                     | 74                                       |
| PCL/ S/PCL-g-GMA 80/20/5  | 2                       | 34                     | 57                                       | 55                     | 77                                       |
| PCL/ S/PCL-g-GMA 70/30/5  | 6                       | 33                     | 51                                       | 56                     | 68                                       |

On the other hand, the presence of starch has a clear influence on the thermal properties and namely resulting in an increase of the PCL melting and crystallization enthalpies, probably due to a similar effect as the one proposed above.
